# Supplementary material for: Causal role of immune cells in schizophrenia: Mendelian randomization (MR) study
Source: Springer Nature journal article supplement (doi:10.1186/s12888-023-05081-4), 2023-08-15
Supplement: MOESM7 [file 25925480]

## 1 **Supplementary Methods**

2 Sample exclusions and imputation were performed using the following steps:

3 For the genetic analyses of immune cells, a genetic map based on 6,602 samples was  
4 used, genotyped using four Illumina arrays (OmniExpress, ImmunoChip, Cardio-  
5 MetaboChip, and ExomeChip). Pre-phased genotypes were imputed genome-wide  
6 using a reference panel of 3,514 individuals and the Minimac58 software. After  
7 imputation, only SNPs with an  $RSQR > 0.3$  (estimated minor allele frequency (MAF)  
8  $\geq 1\%$ ) or  $> 0.6$  (MAF  $< 1\%$ ) were retained for association analyses, resulting in  
9 approximately 22 million variants.

10 For SCZ, two meta-analyses were conducted, including a first-stage analysis of cohorts  
11 with case-control phenotypes (the IGAP, ADSP, and PGC-ALZ datasets) and a proxy  
12 phenotype in the UKB cohort included in the third stage.
